# Supplementary material for: Marine Bacterial Polysaccharide EPS11 Inhibits Cancer Cell Growth and Metastasis via Blocking Cell Adhesion and Attenuating Filiform Structure Formation
Source: MDPI journal article supplement (doi:10.3390/md17010050), 2019-01-11
Supplement: s1 [file s1]

# **Supplementary information**

## **Marine Bacterial Polysaccharide EPS11 Inhibits Cancer Cell Growth and Metastasis via Blocking Cell Adhesion and Attenuating Filiform Structures Formation**

**Ju wang<sup>1, 2, 3</sup>, Ge Liu<sup>1, 2, 4</sup>, Weiping Ma<sup>5</sup>, Zhongxia Lu<sup>5</sup>, and Chaomin Sun<sup>1, 2, 4\*</sup>**

<sup>1</sup>CAS Key Laboratory of Experimental Marine Biology, Institute of Oceanology, Chinese Academy of Sciences, Qingdao 266071, China

<sup>2</sup>Laboratory for Marine Biology and Biotechnology, Qingdao National Laboratory for Marine Science and Technology, Qingdao 266071, China

<sup>3</sup>University of Chinese Academy of Sciences, Beijing 100049, China

<sup>4</sup>Center for Ocean Mega-Science, Chinese Academy of Sciences, Qingdao 266071, China

<sup>5</sup>School of Medicine and Pharmacy, Ocean University of China, Qingdao 266003, China

\*Corresponding: Chaomin Sun, [sunchaomin@qdio.ac.cn](mailto:sunchaomin@qdio.ac.cn); Tel.: +86-532-82898857; fax: +86-532-82898648.

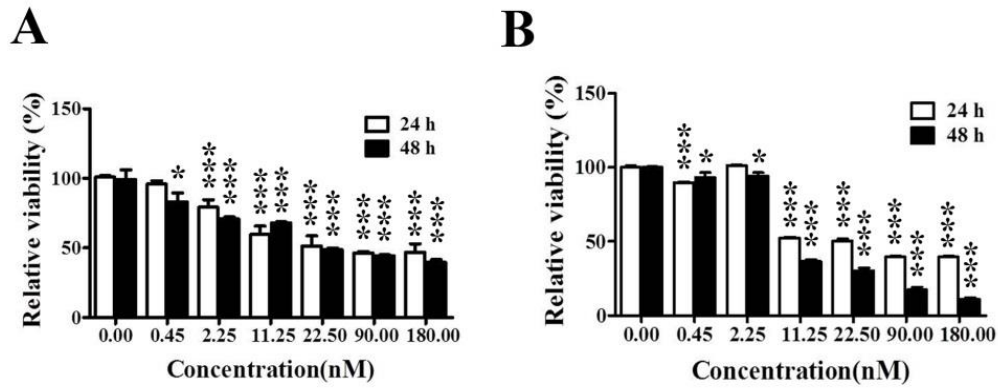

**Figure S1.** Cytotoxic effects of EPS11 on liver cancer cell lines 7402 (A) and HepG2 (B). Cells were seeded in 96-well plate overnight, and treated with different concentrations of EPS11 for 24 hours and 48 hours, respectively. The cell viability was analyzed by MTT assay. Data were presented as means  $\pm$  SD of three independent experiments ( $n = 3$ ). \*  $p < 0.05$ , \*\*  $p < 0.01$ , \*\*\*  $p < 0.001$ .

**A**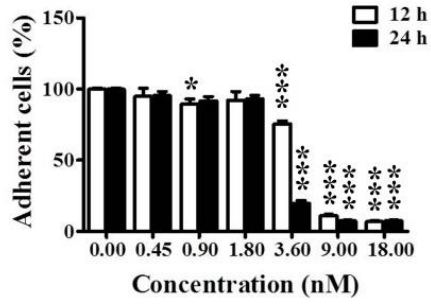**B**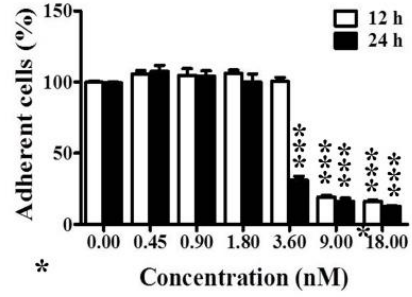

**Figure S2.** Quantification assay of cell adhesion in liver cancer cell lines 7402 (**A**) and HepG2 (**B**) after treatment with different concentrations of EPS11 for 12 hours and 24 hours, respectively. The data were presented as means  $\pm$  SD of three observation fields in one representative experiment chosen from three independent experiments. \* $p < 0.05$ , \*\* $p < 0.01$ , \*\*\* $p < 0.001$ .
